# Supplementary material for: Utility of Clinical Next Generation Sequencing Tests in KIT/PDGFRA/SDH Wild-Type Gastrointestinal Stromal Tumors
Source: MDPI journal article supplement (doi:10.3390/cancers16091707), 2024-04-27
Supplement: s1 [file s1]

**Table S1.** Review of all the cases of triple or quadruple negative GIST reported in the literature.

| Ref           | Age at Diagnosis | Sex    | Primary Site    | Primary Tumor Size (cm) | Mitotic rate (per 50 hpf or 5 mm <sup>2</sup> ) | Disease State at Diagnosis | Presumed Driver Mutation                                                                                      |
|---------------|------------------|--------|-----------------|-------------------------|-------------------------------------------------|----------------------------|---------------------------------------------------------------------------------------------------------------|
| Current study | 41               | Male   | Gastric         | 22                      | 50                                              | IIIB                       | <i>PTEN</i> deletion                                                                                          |
| Current study | 68               | Female | Small intestine | 4.5                     | 69                                              | IV                         | ?                                                                                                             |
| Current study | 38               | Male   | Small intestine | 2.5                     | 0                                               | IA                         | <i>FGFR1</i> GOF                                                                                              |
| Current study | 21               | Female | Gastric         | 7                       | 0                                               | IB                         | ?                                                                                                             |
| Current study | 17               | Female | Gastric         | 6.5                     | 3                                               | IV                         | ?                                                                                                             |
| Current study | 12               | Female | Gastric         | NA                      | 20                                              | ?                          | <i>BRAF</i> V600E                                                                                             |
| Current study | 57               | Female | Small intestine | 5.7                     | 12                                              | IB                         | ?                                                                                                             |
| Current study | 44               | Male   | Gastric         | 12                      | 75                                              | IV                         | <i>NTRK3</i> fusion                                                                                           |
| Current study | 37               | Male   | Gastric         | 30                      | 8                                               | IV                         | ?                                                                                                             |
| Current study | 72               | Male   | Small intestine | 5                       | 18                                              | IV                         | <i>NF1</i> deletion                                                                                           |
| Current study | 58               | Male   | Small intestine | 15                      | 44                                              | IIIB                       | <i>BRAF</i> V600E                                                                                             |
| Current study | 48               | Female | Small intestine | 6                       | 15                                              | IIIA                       | ?                                                                                                             |
| Current study | 14               | Female | Gastric         | NA                      | NA                                              | NA                         | <i>CHEK2</i> LOF                                                                                              |
| Current study | 73               | Male   | Small intestine | 8.9                     | 156                                             | IV                         | Aurora A fusion                                                                                               |
| Current study | 50               | Female | Gastric         | 7                       | NA                                              | NA                         | <i>NF2</i> splice site mutation, <i>FGF3/FGF19</i> amplification, <i>CCND1</i> amplification, <i>TP53</i> LOF |
| Current study | 58               | Female | Gastric         | 2                       | 50                                              | II                         | <i>NF1</i> splice site                                                                                        |
| Current study | 54               | Female | Colorectum      | 5.2                     | 8                                               | IIIA                       | <i>FANCA</i> deletion                                                                                         |
| Current study | 53               | Male   | Small intestine | 9.5                     | 2                                               | IV                         | <i>TP53</i> LOF                                                                                               |
| Current study | 25               | Female | Gastric         | 14.5                    | 10                                              | IV                         | ?                                                                                                             |
| Current study | 11               | Female | Gastric         | NA                      | NA                                              | NA                         | ?                                                                                                             |
| [19]          | NA               | NA     | NA              | NA                      | 103                                             | NA                         | <i>BRAF</i> V600E                                                                                             |
| [19]          | NA               | NA     | NA              | NA                      | 0                                               | NA                         | <i>BRAF</i> V600E                                                                                             |
| [19]          | NA               | NA     | NA              | NA                      | NA                                              | NA                         | <i>BRAF</i> V600E                                                                                             |
| [19]          | NA               | NA     | NA              | NA                      | 18                                              | NA                         | <i>NF1</i> indel/frameshift (p.H2240fs)                                                                       |
| [19]          | NA               | NA     | NA              | NA                      | 147                                             | NA                         | <i>NF1</i> indel/frameshift (p.17_17del, p.G629R)                                                             |
| [19]          | NA               | NA     | NA              | NA                      | 2                                               | NA                         | <i>NF1</i> missense (p.E775G)                                                                                 |
| [19]          | NA               | NA     | NA              | NA                      | 160                                             | NA                         | <i>CBL</i> missense (p.P417H)                                                                                 |
| [19]          | NA               | NA     | NA              | NA                      | 42                                              | NA                         | <i>KIT-PDGFR</i> fusion                                                                                       |
| [19]          | NA               | NA     | NA              | NA                      | 20                                              | NA                         | <i>ARID1A</i> missense (p.M918I)                                                                              |
| [19]          | NA               | NA     | NA              | NA                      | <5                                              | NA                         | ?                                                                                                             |
| [19]          | NA               | NA     | NA              | NA                      | 2                                               | NA                         | ?                                                                                                             |
| [20]          | NA               | NA     | NA              | NA                      | NA                                              | NA                         | <i>NF1</i> nonsense (p.Q959X)                                                                                 |

|      |    |        |                 |           |    |           |                                                  |
|------|----|--------|-----------------|-----------|----|-----------|--------------------------------------------------|
| [20] | NA | NA     | NA              | NA        | NA | NA        | <i>NF1</i> nonsense (p.Q519X)                    |
| [20] | NA | NA     | NA              | NA        | NA | NA        | <i>NF1</i> nonsense (p.R1241fs)                  |
| [34] | 57 | Male   | Small intestine | NA        | NA | Localized | ?                                                |
| [34] | 63 | Female | Small intestine | NA        | NA | Localized | ?                                                |
| [42] | 44 | Male   | Colorectum      | 5         | 34 | NA        | <i>ETV6-NTRK3</i> fusion                         |
| [42] | 86 | Female | Small intestine | 8         | 8  | NA        | ?                                                |
| [42] | 26 | Female | Small intestine | 5         | 10 | NA        | ?                                                |
| [42] | 71 | Female | Small intestine | 10        | 8  | NA        | ?                                                |
| [42] | 31 | Female | Small intestine | 9         | 20 | NA        | ?                                                |
| [18] | 58 | Female | Small intestine | 6         | 2  | NA        | ?                                                |
| [18] | 35 | Male   | NA              | NA        | NA | NA        | <i>NF1</i> nonsense                              |
| [18] | 76 | Female | Small intestine | 1.5 + 2.5 | 1  | NA        | <i>NF1</i> splice acceptor variant               |
| [18] | 69 | Female | Small intestine | NA        | 21 | NA        | <i>TP53</i> LOF                                  |
| [18] | 73 | Female | Small intestine | 8         | 18 | NA        | <i>NF1</i> deletion                              |
| [18] | 53 | Male   | Retroperitoneum | 8         | 20 | NA        | ?                                                |
| [18] | 60 | Female | Small intestine | 6         | 2  | NA        | <i>NF1</i> nonsense and frameshift mutations     |
| [18] | 31 | Female | Small intestine | 9         | 83 | NA        | <i>NF1</i> nonsense                              |
| [18] | 73 | Female | Peritoneum      | 16        | 30 | NA        | <i>NF1</i> missense variant                      |
| [18] | 77 | Female | Gastric         | 15        | 29 | NA        | ?                                                |
| [18] | 59 | Male   | Small intestine | 1.5       | 0  | NA        | <i>NF1</i> frameshift and splice donor mutations |
| [18] | 50 | Male   | Small intestine | 6         | 1  | NA        | <i>NF1</i> splice acceptor and donor mutations   |
| [18] | 86 | Female | Small intestine | 8         | 8  | NA        | <i>NF1</i> nonsense                              |
| [18] | 68 | Female | Gastric         | 5.5       | 5  | NA        | ?                                                |
| [18] | 68 | Male   | Small intestine | 2.3       | 1  | NA        | ?                                                |
| [18] | 70 | Female | Small intestine | 11.5      | 87 | NA        | ?                                                |
| [18] | 41 | Female | Colorectum      | 8         | 39 | NA        | <i>NF1</i> missense variant                      |
| [18] | 56 | Male   | Gastric         | 3.2       | 8  | NA        | <i>NF1</i> frameshift variant                    |
| [18] | 67 | Female | Small intestine | 3         | 2  | NA        | <i>NF1</i> deletion and frameshift mutations     |
| [18] | 60 | Male   | Small intestine | 4.5       | 3  | NA        | ?                                                |
| [18] | 36 | Male   | Gastric         | 11        | 10 | NA        | <i>NF1</i> frameshift mutation                   |
| [18] | 30 | Female | Small intestine | 3.2       | 3  | NA        | ?                                                |
| [22] | 52 | Female | Small intestine | 10        | 90 | Primary   | <i>BRAF</i>                                      |
| [22] | 55 | Female | Small intestine | 10        | 5  | Primary   | <i>BRAF</i>                                      |
| [22] | 59 | Female | Small intestine | 9         | 50 | Primary   | <i>BRAF</i>                                      |
| [22] | 66 | Male   | Peritoneum      | NA        | NA | Relapsed  | <i>BRAF</i>                                      |
| [49] | 70 | Male   | Gastric         | 0.4       | <5 | Primary   | <i>BRAF</i>                                      |
| [49] | 80 | Male   | Small intestine | 0.4       | <5 | Primary   | <i>BRAF</i>                                      |
| [50] | 53 | Male   | Small intestine | 20        | 6  | Primary   | <i>BRAF</i>                                      |
| [50] | 38 | Male   | Small intestine | 2.5       | 5  | Primary   | <i>BRAF</i>                                      |

|         |    |        |                 |      |      |           |                                                       |
|---------|----|--------|-----------------|------|------|-----------|-------------------------------------------------------|
| [50]    | 63 | Male   | Gastric         | 2.5  | NA   | Primary   | <i>BRAF</i>                                           |
| [50]    | 78 | Male   | Gastric         | NA   | 1    | Primary   | <i>BRAF</i>                                           |
| [50]    | 51 | Female | Small intestine | 3    | 10   | Primary   | <i>BRAF</i>                                           |
| [50]    | 58 | Male   | Small intestine | 2.5  | 1    | Primary   | <i>BRAF</i>                                           |
| [50]    | 58 | Male   | Small intestine | 2.5  | 6    | Primary   | <i>BRAF</i>                                           |
| [50]    | 41 | Male   | Small intestine | 2.5  | 3    | Primary   | <i>BRAF</i>                                           |
| [50]    | 50 | Female | Peritoneum      | 2.8  | 50   | Primary   | <i>BRAF</i>                                           |
| [31]    | NA | NA     | Small intestine | NA   | NA   | Primary   | <i>BRAF</i>                                           |
| [31]    | NA | NA     | NA              | NA   | NA   | Primary   | <i>BRAF</i>                                           |
| [32]    | 60 | Male   | NA              | 15   | 6    | Primary   | <i>BRAF</i>                                           |
| [33]    | 75 | Male   | Peritoneum      | NA   | 8    | Relapsed  | <i>BRAF</i>                                           |
| [24]    | 69 | Male   | Small intestine | 4.6  | 4    | Primary   | <i>BRAF</i>                                           |
| [24]    | 36 | Female | Small intestine | 8.5  | 3    | Primary   | <i>BRAF</i>                                           |
| [24]    | 66 | Female | Small intestine | 5.4  | 8    | Primary   | <i>BRAF</i>                                           |
| [24]    | 63 | Male   | Small intestine | 11.2 | 12   | Primary   | <i>BRAF</i>                                           |
| [24]    | 42 | Female | Small intestine | 3.8  | 7    | Primary   | <i>BRAF</i>                                           |
| [24]    | 89 | Female | Small intestine | 1.8  | 1    | Primary   | <i>BRAF</i>                                           |
| [36,39] | 63 | Female | Small intestine | 5-10 | 6-10 | Distant   | <i>CTNND2</i> LOF, <i>FGF4</i> amplification          |
| [36]    | 73 | Female | Small intestine | 12   | 100  | Localized | <i>TP53</i>                                           |
| [36,39] | 50 | Male   | Small intestine | 8.5  | 2    | Localized | <i>NF1</i> , <i>MAX</i>                               |
| [36]    | 41 | Female | Colon           | 8    | 80   | Distant   | <i>NF1</i>                                            |
| [36,39] | 73 | Male   | Small intestine | 13   | <5   | Localized | <i>MEN1</i> , <i>TP53</i> , <i>FGF4</i> amplification |
| [36,39] | 45 | Female | Small intestine | NA   | NA   | Localized | <i>CDH4</i> , <i>FGF4</i> amplification               |
| [36,39] | 45 | Male   | Small intestine | NA   | NA   | Localized | <i>FGFR1</i>                                          |
| [39]    | 57 | Male   | Small intestine | 1.6  | <5   | Localized | <i>FGF4</i> amplification                             |
| [39]    | 69 | Male   | Small intestine | NA   | NA   | Localized | <i>FGF4</i> amplification                             |
| [39]    | 44 | Male   | Small intestine | 6.5  | >5   | Distant   | <i>FGF4</i> amplification                             |
| [23]    | 71 | Female | Esophagus       | 2.8  | < 5  | NA        | <i>BRAF</i>                                           |
| [23]    | 68 | Female | Gastric         | 10.5 | 2    | NA        | <i>BRAF</i>                                           |
| [23]    | 60 | Female | Small intestine | 8.0  | < 5  | NA        | <i>BRAF</i>                                           |
| [25]    | 54 | Male   | Small intestine | NA   | 5-10 | NA        | <i>NF1</i> frameshift                                 |
| [37]    | 38 | Female | Small intestine |      |      | T3N1M1    | <i>FGFR1-HOOK3</i> fusion                             |
| [37]    | 54 | Male   | Gastric         |      |      | T3N1M1    | <i>FGFR1-TACC1</i> fusion                             |
| [37]    | 55 | Male   | Small intestine |      |      | T3N0M1    | <i>ETV6-NTRK3</i> fusion                              |
| [37]    | 60 | Male   | Small intestine |      |      | T3NxM1    | <i>FGFR1</i> missense mutation                        |
| [37]    | 72 | Male   | Small intestine |      |      | T4N1Mx    | <i>FGF6</i> amplification                             |
| [37]    | 54 | Male   | Pelvic mass     |      |      |           | <i>FGFR1-TACC1</i> fusion                             |
| [37]    | 54 | Male   | Colorectum      |      |      |           | <i>ETV6-NTRK3</i> fusion                              |
| [37]    | 49 | Male   | Small intestine |      |      |           | ?                                                     |
| [37]    | 51 | Female | NA              |      |      |           | ?                                                     |
| [37]    | 53 | Male   | Gastric         |      |      |           | ?                                                     |

NA, not available; ? indicates that no potential driver alteration was identified.; For the statistics from this table that are described in the text, ranges were recoded as the average of the upper and lower bounds, < 5 was recoded as 0, and > 5 was recoded as 5.
